# Supplementary material for: Evaluation of the prognostic value of CBXs in gastric cancer patients
Source: PubMed Central journal article supplement (PMC8196000; doi:10.1038/s41598-021-91649-7), 2021-06-11
Supplement: 41598_2021_91649_MOESM1_ESM.pdf [file 41598_2021_91649_MOESM1_ESM.pdf]

## **Title page**

### **Prognostic value of CBX3/8 in gastric cancer patients**

Mengya He<sup>1</sup>, Limin Yue<sup>1\*</sup>, Haiyan Wang<sup>1</sup>, Feiyan Yu<sup>1</sup>, Mingyang Yu<sup>1</sup>, Peng Ni<sup>1</sup>, Ke Zhang<sup>1</sup>, Shuaiyin Chen<sup>1</sup>, Guangcai Duan<sup>1\*</sup>, Rongguang Zhang<sup>2,3\*</sup>

<sup>1</sup>Department of Epidemiology, College of Public Health, Zhengzhou University

<sup>2</sup>Department of Epidemiology, College of Public Health, Hainan Medical University

<sup>3</sup>Department of Experimentation Center, College of Public Health, Zhengzhou University

Mengya He and Limin Yue are the co-first authors; Limin Yue, Guangcai Duan and Rongguang Zhang are the co-corresponding authors.

#### **\*Corresponding Author:**

Limin Yue. Email: ylm1412217418@163.com, Department of Epidemiology, College of Public Health, Zhengzhou University, No.100 Kexue Avenue, Zhengzhou 450001, China. ORCID: 0000-0001-7035-1007.

Guangcai Duan. Email: gcduan@zzu.edu.cn, Department of Epidemiology, College of Public Health, Zhengzhou University, No.100 Kexue Avenue, Zhengzhou 450001, China. ORCID: 0000-0003-1353-9833.

Rongguang Zhang. Email: zrg@zzu.edu.cn, Department of Epidemiology, College of Public Health, Hainan Medical University, No.3 Xueyuan Road, Longhua District, Haikou 570216, China; Experimentation Center, College of Public Health, Zhengzhou University, No.100 Kexue Avenue, Zhengzhou 450001, China. ORCID: 0000-0001-9961-2434.

Supplementary Table 1. Basic characteristics of 335 GC patients (from TCGA survival data).

| Variables                 | N (%)       |
|---------------------------|-------------|
| Gender                    |             |
| Male                      | 209 (62.4%) |
| Female                    | 126 (37.6%) |
| Age                       |             |
| 35-54                     | 55 (16.4%)  |
| 55-74                     | 206 (61.5%) |
| ≥ 75                      | 74 (22.1%)  |
| Race                      |             |
| White                     | 214 (63.9%) |
| Asian                     | 65 (19.4%)  |
| Black or African American | 10 (3.0%)   |
| Not reported              | 46 (13.7%)  |
| Pharmaceutical therapy    |             |
| No                        | 154 (46.0%) |
| Yes                       | 148 (44.2%) |
| Not reported              | 33 (9.9%)   |
| Radiation therapy         |             |
| No                        | 246 (73.4%) |
| Yes                       | 57 (17.0%)  |
| Not reported              | 32 (9.6%)   |
| Grade                     |             |
| G1                        | 10 (2.7%)   |
| G2                        | 132 (36.0%) |
| G3                        | 216 (58.9%) |
| GX                        | 9 (2.5%)    |
| Stage                     |             |
| I-II                      | 158 (43.1%) |
| III-IV                    | 186 (50.7%) |
| unknown                   | 23 (6.3%)   |
| Topography                |             |
| T1-2                      | 88 (26.3%)  |
| T3-4                      | 239 (71.3%) |
| TX                        | 8 (2.4%)    |
| Lymph Node                |             |
| N0                        | 98 (29.3%)  |
| N1-3                      | 221 (66.0%) |
| NX                        | 16 (4.8%)   |
| Metastasis                |             |
| M0                        | 299 (89.3%) |
| M1                        | 23 (6.9%)   |
| MX                        | 13 (3.9%)   |

OS: overall survival, GC: gastric cancer.

Supplementary Table 2. Multivariate analysis of OS in 335 GC patients (from TCGA survival data).

| Variables                 | Multivariate analysis |             |                    |
|---------------------------|-----------------------|-------------|--------------------|
|                           | Hazard ratio          | 95% CI      | <i>P</i> value     |
| Gender                    |                       |             |                    |
| Male                      | Ref                   |             |                    |
| Female                    | 0.819                 | 0.562-1.193 | 0.298              |
| Age                       |                       |             |                    |
| 35-54                     | Ref                   |             |                    |
| 55-74                     | 1.438                 | 0.831-2.487 | 0.194              |
| ≥ 75                      | 1.933                 | 1.025-3.642 | 0.042              |
| Race                      |                       |             |                    |
| White                     | Ref                   |             |                    |
| Asian                     | 0.812                 | 0.466-1.416 | 0.464              |
| Black or African American | 1.373                 | 0.605-3.112 | 0.448              |
| Pharmaceutical therapy    |                       |             |                    |
| No                        | Ref                   |             |                    |
| Yes                       | 0.826                 | 0.534-1.279 | 0.392              |
| Radiation therapy         |                       |             |                    |
| No                        | Ref                   |             |                    |
| Yes                       | 0.575                 | 0.323-1.023 | 0.060              |
| Grade                     |                       |             |                    |
| G1                        | Ref                   |             |                    |
| G2                        | 1.209                 | 0.386-3.788 | 0.744              |
| G3                        | 1.065                 | 0.347-3.272 | 0.912              |
| Stage                     |                       |             |                    |
| I-II                      | Ref                   |             |                    |
| III-IV                    | 1.341                 | 0.780-2.307 | 0.288              |
| Topography                |                       |             |                    |
| T1-2                      | Ref                   |             |                    |
| T3-4                      | 1.406                 | 0.828-2.387 | 0.208              |
| Lymph Node                |                       |             |                    |
| N0                        | Ref                   |             |                    |
| N1-3                      | 1.599                 | 0.881-2.901 | 0.122              |
| Metastasis                |                       |             |                    |
| M0                        | Ref                   |             |                    |
| M1                        | 1.617                 | 0.925-2.826 | 0.091              |
| CBX1                      |                       |             |                    |
| Low                       | Ref                   |             |                    |
| High                      | 0.981                 | 0.684-1.406 | 0.916 <sup>▲</sup> |

OS: overall survival, GC: gastric cancer. <sup>▲</sup>Adjusting for age, gender, race, pharmaceutical therapy, radiation therapy, grade, stage, topography, lymph node, and metastasis.

Supplementary Table 3. Multivariate analysis of OS in 335 GC patients (from TCGA survival data).

| Variables                 | Multivariate analysis |             |                    |
|---------------------------|-----------------------|-------------|--------------------|
|                           | Hazard ratio          | 95% CI      | <i>P</i> value     |
| Gender                    |                       |             |                    |
| Male                      | Ref                   |             |                    |
| Female                    | 0.818                 | 0.561-1.192 | 0.295              |
| Age                       |                       |             |                    |
| 35-54                     | Ref                   |             |                    |
| 55-74                     | 1.470                 | 0.847-2.551 | 0.171              |
| ≥ 75                      | 1.986                 | 1.048-3.764 | 0.035              |
| Race                      |                       |             |                    |
| White                     | Ref                   |             |                    |
| Asian                     | 0.821                 | 0.471-1.432 | 0.488              |
| Black or African American | 1.376                 | 0.608-3.114 | 0.444              |
| Pharmaceutical therapy    |                       |             |                    |
| No                        | Ref                   |             |                    |
| Yes                       | 0.826                 | 0.534-1.279 | 0.392              |
| Radiation therapy         |                       |             |                    |
| No                        | Ref                   |             |                    |
| Yes                       | 0.836                 | 0.539-1.297 | 0.423              |
| Grade                     |                       |             |                    |
| G1                        | Ref                   |             |                    |
| G2                        | 1.241                 | 0.393-3.920 | 0.713              |
| G3                        | 1.093                 | 0.353-3.379 | 0.878              |
| Stage                     |                       |             |                    |
| I-II                      | Ref                   |             |                    |
| III-IV                    | 1.329                 | 0.774-2.280 | 0.302              |
| Topography                |                       |             |                    |
| T1-2                      | Ref                   |             |                    |
| T3-4                      | 1.450                 | 0.854-2.463 | 0.169              |
| Lymph Node                |                       |             |                    |
| N0                        | Ref                   |             |                    |
| N1-3                      | 1.584                 | 0.874-2.870 | 0.130              |
| Metastasis                |                       |             |                    |
| M0                        | Ref                   |             |                    |
| M1                        | 1.673                 | 0.951-2.942 | 0.074              |
| CBX2                      |                       |             |                    |
| Low                       | Ref                   |             |                    |
| High                      | 0.872                 | 0.609-1.251 | 0.458 <sup>▲</sup> |

OS: overall survival, GC: gastric cancer. <sup>▲</sup>Adjusting for age, gender, race, pharmaceutical therapy, radiation therapy, grade, stage, topography, lymph node, and metastasis.

Supplementary Table 4. Multivariate analysis of OS in 335 GC patients (from TCGA survival data).

| Variables                 | Multivariate analysis |             |                    |
|---------------------------|-----------------------|-------------|--------------------|
|                           | Hazard ratio          | 95% CI      | <i>P</i> value     |
| Gender                    |                       |             |                    |
| Male                      | Ref                   |             |                    |
| Female                    | 0.823                 | 0.564-1.203 | 0.315              |
| Age                       |                       |             |                    |
| 35-54                     | Ref                   |             |                    |
| 55-74                     | 1.576                 | 0.908-2.735 | 0.106              |
| ≥ 75                      | 2.063                 | 1.097-3.880 | 0.025              |
| Race                      |                       |             |                    |
| White                     | Ref                   |             |                    |
| Asian                     | 0.896                 | 0.515-1.559 | 0.697              |
| Black or African American | 1.521                 | 0.674-3.430 | 0.312              |
| Pharmaceutical therapy    |                       |             |                    |
| No                        | Ref                   |             |                    |
| Yes                       | 0.679                 | 0.474-0.972 | 0.034              |
| Radiation therapy         |                       |             |                    |
| No                        | Ref                   |             |                    |
| Yes                       | 0.530                 | 0.297-0.945 | 0.031              |
| Grade                     |                       |             |                    |
| G1                        | Ref                   |             |                    |
| G2                        | 1.190                 | 0.375-3.770 | 0.768              |
| G3                        | 1.055                 | 0.338-3.296 | 0.926              |
| Stage                     |                       |             |                    |
| I-II                      | Ref                   |             |                    |
| III-IV                    | 1.295                 | 0.752-2.228 | 0.351              |
| Topography                |                       |             |                    |
| T1-2                      | Ref                   |             |                    |
| T3-4                      | 1.588                 | 0.936-2.693 | 0.086              |
| Lymph Node                |                       |             |                    |
| N0                        | Ref                   |             |                    |
| N1-3                      | 1.552                 | 0.854-2.820 | 0.150              |
| Metastasis                |                       |             |                    |
| M0                        | Ref                   |             |                    |
| M1                        | 1.582                 | 0.906-2.762 | 0.107              |
| CBX3                      |                       |             |                    |
| Low                       | Ref                   |             |                    |
| High                      | 0.613                 | 0.424-0.887 | 0.010 <sup>▲</sup> |

OS: overall survival, GC: gastric cancer. <sup>▲</sup>Adjusting for age, gender, race, pharmaceutical therapy, radiation therapy, grade, stage, topography, lymph node, and metastasis.

Supplementary Table 5. Multivariate analysis of OS in 335 GC patients (from TCGA survival data).

| Variables                 | Multivariate analysis |             |                    |
|---------------------------|-----------------------|-------------|--------------------|
|                           | Hazard ratio          | 95% CI      | <i>P</i> value     |
| Gender                    |                       |             |                    |
| Male                      | Ref                   |             |                    |
| Female                    | 0.819                 | 0.562-1.193 | 0.298              |
| Age                       |                       |             |                    |
| 35-54                     | Ref                   |             |                    |
| 55-74                     | 1.435                 | 0.827-2.491 | 0.199              |
| ≥ 75                      | 1.930                 | 1.023-3.640 | 0.042              |
| Race                      |                       |             |                    |
| White                     | Ref                   |             |                    |
| Asian                     | 0.810                 | 0.466-1.409 | 0.456              |
| Black or African American | 1.370                 | 0.605-3.103 | 0.451              |
| Pharmaceutical therapy    |                       |             |                    |
| No                        | Ref                   |             |                    |
| Yes                       | 0.826                 | 0.534-1.279 | 0.392              |
| Radiation therapy         |                       |             |                    |
| No                        | Ref                   |             |                    |
| Yes                       | 0.577                 | 0.324-1.026 | 0.061              |
| Grade                     |                       |             |                    |
| G1                        | Ref                   |             |                    |
| G2                        | 1.204                 | 0.385-3.764 | 0.750              |
| G3                        | 1.064                 | 0.347-3.268 | 0.913              |
| Stage                     |                       |             |                    |
| I-II                      | Ref                   |             |                    |
| III-IV                    | 1.339                 | 0.779-2.299 | 0.291              |
| Topography                |                       |             |                    |
| T1-2                      | Ref                   |             |                    |
| T3-4                      | 1.411                 | 0.836-2.383 | 0.198              |
| Lymph Node                |                       |             |                    |
| N0                        | Ref                   |             |                    |
| N1-3                      | 1.601                 | 0.882-2.904 | 0.121              |
| Metastasis                |                       |             |                    |
| M0                        | Ref                   |             |                    |
| M1                        | 1.617                 | 0.924-2.828 | 0.092              |
| CBX4                      |                       |             |                    |
| Low                       | Ref                   |             |                    |
| High                      | 1.012                 | 0.709-1.444 | 0.949 <sup>▲</sup> |

OS: overall survival, GC: gastric cancer. <sup>▲</sup>Adjusting for age, gender, race, pharmaceutical therapy, radiation therapy, grade, stage, topography, lymph node, and metastasis.

Supplementary Table 6. Multivariate analysis of OS in 335 GC patients (from TCGA survival data).

| Variables                 | Multivariate analysis |             |                    |
|---------------------------|-----------------------|-------------|--------------------|
|                           | Hazard ratio          | 95% CI      | <i>P</i> value     |
| Gender                    |                       |             |                    |
| Male                      | Ref                   |             |                    |
| Female                    | 0.804                 | 0.551-1.171 | 0.255              |
| Age                       |                       |             |                    |
| 35-54                     | Ref                   |             |                    |
| 55-74                     | 1.395                 | 0.805-2.416 | 0.235              |
| ≥ 75                      | 1.884                 | 0.999-3.552 | 0.050              |
| Race                      |                       |             |                    |
| White                     | Ref                   |             |                    |
| Asian                     | 0.826                 | 0.474-1.438 | 0.499              |
| Black or African American | 1.251                 | 0.547-2.862 | 0.595              |
| Pharmaceutical therapy    |                       |             |                    |
| No                        | Ref                   |             |                    |
| Yes                       | 0.799                 | 0.513-1.243 | 0.319              |
| Radiation therapy         |                       |             |                    |
| No                        | Ref                   |             |                    |
| Yes                       | 0.586                 | 0.329-1.047 | 0.071              |
| Grade                     |                       |             |                    |
| G1                        | Ref                   |             |                    |
| G2                        | 1.240                 | 0.394-3.898 | 0.713              |
| G3                        | 1.107                 | 0.357-3.431 | 0.860              |
| Stage                     |                       |             |                    |
| I-II                      | Ref                   |             |                    |
| III-IV                    | 1.309                 | 0.759-2.257 | 0.334              |
| Topography                |                       |             |                    |
| T1-2                      | Ref                   |             |                    |
| T3-4                      | 1.420                 | 0.840-2.398 | 0.190              |
| Lymph Node                |                       |             |                    |
| N0                        | Ref                   |             |                    |
| N1-3                      | 1.621                 | 0.891-2.951 | 0.114              |
| Metastasis                |                       |             |                    |
| M0                        | Ref                   |             |                    |
| M1                        | 1.588                 | 0.908-2.778 | 0.105              |
| CBX5                      |                       |             |                    |
| Low                       | Ref                   |             |                    |
| High                      | 1.279                 | 0.891-1.836 | 0.182 <sup>▲</sup> |

OS: overall survival, GC: gastric cancer. <sup>▲</sup>Adjusting for age, gender, race, pharmaceutical therapy, radiation therapy, grade, stage, topography, lymph node, and metastasis.

Supplementary Table 7. Multivariate analysis of OS in 335 GC patients (from TCGA survival data).

| Variables                 | Multivariate analysis |             |                    |
|---------------------------|-----------------------|-------------|--------------------|
|                           | Hazard ratio          | 95% CI      | <i>P</i> value     |
| Gender                    |                       |             |                    |
| Male                      | Ref                   |             |                    |
| Female                    | 0.821                 | 0.563-1.196 | 0.304              |
| Age                       |                       |             |                    |
| 35-54                     | Ref                   |             |                    |
| 55-74                     | 1.428                 | 0.827-2.467 | 0.202              |
| ≥ 75                      | 1.934                 | 1.026-3.645 | 0.041              |
| Race                      |                       |             |                    |
| White                     | Ref                   |             |                    |
| Asian                     | 0.820                 | 0.472-1.425 | 0.482              |
| Black or African American | 1.358                 | 0.599-3.078 | 0.464              |
| Pharmaceutical therapy    |                       |             |                    |
| No                        | Ref                   |             |                    |
| Yes                       | 0.834                 | 0.539-1.291 | 0.416              |
| Radiation therapy         |                       |             |                    |
| No                        | Ref                   |             |                    |
| Yes                       | 0.589                 | 0.331-1.049 | 0.072              |
| Grade                     |                       |             |                    |
| G1                        | Ref                   |             |                    |
| G2                        | 1.159                 | 0.370-3.633 | 0.800              |
| G3                        | 1.024                 | 0.332-3.157 | 0.967              |
| Stage                     |                       |             |                    |
| I-II                      | Ref                   |             |                    |
| III-IV                    | 1.361                 | 0.793-2.335 | 0.263              |
| Topography                |                       |             |                    |
| T1-2                      | Ref                   |             |                    |
| T3-4                      | 1.412                 | 0.837-2.383 | 0.196              |
| Lymph Node                |                       |             |                    |
| N0                        | Ref                   |             |                    |
| N1-3                      | 1.566                 | 0.862-2.845 | 0.141              |
| Metastasis                |                       |             |                    |
| M0                        | Ref                   |             |                    |
| M1                        | 1.592                 | 0.911-2.782 | 0.103              |
| CBX6                      |                       |             |                    |
| Low                       | Ref                   |             |                    |
| High                      | 1.158                 | 0.795-1.686 | 0.445 <sup>▲</sup> |

OS: overall survival, GC: gastric cancer. <sup>▲</sup>Adjusting for age, gender, race, pharmaceutical therapy, radiation therapy, grade, stage, topography, lymph node, and metastasis.



Supplementary Table 8. Multivariate analysis of OS in 335 GC patients (from TCGA survival data).

| Variables                 | Multivariate analysis |             |                    |
|---------------------------|-----------------------|-------------|--------------------|
|                           | Hazard ratio          | 95% CI      | <i>P</i> value     |
| Gender                    |                       |             |                    |
| Male                      | Ref                   |             |                    |
| Female                    | 0.826                 | 0.567-1.205 | 0.321              |
| Age                       |                       |             |                    |
| 35-54                     | Ref                   |             |                    |
| 55-74                     | 1.441                 | 0.835-2.489 | 0.190              |
| ≥ 75                      | 1.927                 | 1.024-3.627 | 0.042              |
| Race                      |                       |             |                    |
| White                     | Ref                   |             |                    |
| Asian                     | 0.832                 | 0.477-1.451 | 0.518              |
| Black or African American | 1.347                 | 0.594-3.054 | 0.476              |
| Pharmaceutical therapy    |                       |             |                    |
| No                        | Ref                   |             |                    |
| Yes                       | 0.829                 | 0.536-1.283 | 0.401              |
| Radiation therapy         |                       |             |                    |
| No                        | Ref                   |             |                    |
| Yes                       | 0.567                 | 0.319-1.009 | 0.054              |
| Grade                     |                       |             |                    |
| G1                        | Ref                   |             |                    |
| G2                        | 1.132                 | 0.360-3.560 | 0.832              |
| G3                        | 1.012                 | 0.328-3.120 | 0.983              |
| Stage                     |                       |             |                    |
| I-II                      | Ref                   |             |                    |
| III-IV                    | 1.351                 | 0.788-2.317 | 0.274              |
| Topography                |                       |             |                    |
| T1-2                      | Ref                   |             |                    |
| T3-4                      | 1.436                 | 0.848-2.433 | 0.178              |
| Lymph Node                |                       |             |                    |
| N0                        | Ref                   |             |                    |
| N1-3                      | 1.595                 | 0.879-2.895 | 0.124              |
| Metastasis                |                       |             |                    |
| M0                        | Ref                   |             |                    |
| M1                        | 1.649                 | 0.944-2.880 | 0.079              |
| CBX7                      |                       |             |                    |
| Low                       | Ref                   |             |                    |
| High                      | 1.170                 | 0.816-1.676 | 0.393 <sup>▲</sup> |

OS: overall survival, GC: gastric cancer. <sup>▲</sup>Adjusting for age, gender, race, pharmaceutical therapy, radiation therapy, grade, stage, topography, lymph node, and metastasis.

Supplementary Table 9. Multivariate analysis of OS in 335 GC patients (from TCGA survival data).

| Variables                 | Multivariate analysis |             |                    |
|---------------------------|-----------------------|-------------|--------------------|
|                           | Hazard ratio          | 95% CI      | <i>P</i> value     |
| Gender                    |                       |             |                    |
| Male                      | Ref                   |             |                    |
| Female                    | 0.826                 | 0.567-1.205 | 0.321              |
| Age                       |                       |             |                    |
| 35-54                     | Ref                   |             |                    |
| 55-74                     | 1.441                 | 0.835-2.489 | 0.190              |
| ≥ 75                      | 1.927                 | 1.024-3.627 | 0.042              |
| Race                      |                       |             |                    |
| White                     | Ref                   |             |                    |
| Asian                     | 0.832                 | 0.477-1.451 | 0.518              |
| Black or African American | 1.347                 | 0.594-3.054 | 0.476              |
| Pharmaceutical therapy    |                       |             |                    |
| No                        | Ref                   |             |                    |
| Yes                       | 0.829                 | 0.536-1.283 | 0.401              |
| Radiation therapy         |                       |             |                    |
| No                        | Ref                   |             |                    |
| Yes                       | 0.567                 | 0.319-1.009 | 0.054              |
| Grade                     |                       |             |                    |
| G1                        | Ref                   |             |                    |
| G2                        | 1.132                 | 0.360-3.560 | 0.832              |
| G3                        | 1.012                 | 0.328-3.120 | 0.983              |
| Stage                     |                       |             |                    |
| I-II                      | Ref                   |             |                    |
| III-IV                    | 1.351                 | 0.788-2.317 | 0.274              |
| Topography                |                       |             |                    |
| T1-2                      | Ref                   |             |                    |
| T3-4                      | 1.436                 | 0.848-2.433 | 0.178              |
| Lymph Node                |                       |             |                    |
| N0                        | Ref                   |             |                    |
| N1-3                      | 1.595                 | 0.879-2.895 | 0.124              |
| Metastasis                |                       |             |                    |
| M0                        | Ref                   |             |                    |
| M1                        | 1.649                 | 0.944-2.880 | 0.079              |
| CBX8                      |                       |             |                    |
| Low                       | Ref                   |             |                    |
| High                      | 0.652                 | 0.457-0.929 | 0.018 <sup>▲</sup> |

OS: overall survival, GC: gastric cancer. <sup>▲</sup>Adjusting for age, gender, race, pharmaceutical therapy, radiation therapy, grade, stage, topography, lymph node, and metastasis.

Supplementary Table 10. Association of CBX3/8 with OS in 433 GC patients (from GEO database GSE84437).

| Variables | Multivariate analysis |             |                |
|-----------|-----------------------|-------------|----------------|
|           | Hazard ratio          | 95% CI      | <i>P</i> value |
| CBX3      |                       |             |                |
| Low       | Ref                   |             |                |
| High      | 0.722                 | 0.547-0.954 | 0.022▼         |
| CBX8      |                       |             |                |
| Low       | Ref                   |             |                |
| High      | 0.688                 | 0.522-0.908 | 0.008▼         |

OS: overall survival, GC: gastric cancer. ▼ Adjusting for age, gender, T and N status.
